# Supplementary material
Source: PubMed Central journal article supplement (PMC6803102)
Supplement: NIHMS1540364-supplement-Supplemental_Publication_Material.pdf [file NIHMS1540364-supplement-Supplemental_Publication_Material.pdf]

# **Supplemental Material**

## **Trends in Survival after Pediatric In-Hospital Cardiac Arrest in the United States**

Mathias J. Holmberg, M.D., M.P.H., Sebastian Wiberg, M.D., Ph.D., Catherine E. Ross, M.D.,  
Monica Kleinman, M.D., Anne Kirstine Hoyer-Nielsen, B.Sc., Michael W. Donnino, M.D., and  
Lars W. Andersen, M.D., M.P.H., Ph.D., D.M.Sc., for the American Heart Association's  
Get With The Guidelines®-Resuscitation Investigators

**Contents**

Supplemental Figures .....3

*Characteristics*

    Figure S1. Missing data for neurological status in survivors to hospital discharge.....3

    Figure S2. Trends in extracorporeal membrane oxygenation.....4

*Pulseless cardiac arrest*

    Figure S3. Relative trends in survival for pulseless cardiac arrests.....5

    Figure S4. Absolute trends in ROSC for pulseless cardiac arrests.....7

    Figure S5. Relative trends in ROSC for pulseless cardiac arrests .....8

*Non-pulseless events*

    Figure S6. Relative trends in survival for non-pulseless events ..... 10

    Figure S7. Absolute trends in survival for events progressing into cardiac arrest ..... 12

Supplemental Tables..... 13

*Characteristics*

    Table S1. Missing data for pediatric patients meeting all inclusion criteria..... 13

    Table S2. Additional characteristics of pulseless cardiac arrests..... 14

    Table S3. Additional characteristics of non-pulseless events ..... 15

*Pulseless cardiac arrest*

    Table S4. Outcomes for pulseless cardiac arrests (absolute risk) ..... 16

    Table S5. Survival for pulseless cardiac arrests (relative risk)..... 17

    Table S6. ROSC for pulseless cardiac arrests (relative risk) ..... 18

*Non-pulseless events*

    Table S7. Survival for non-pulseless events (absolute risk) ..... 19

    Table S8. Survival for non-pulseless events (relative risk) ..... 20

Get With The Guidelines® – Resuscitation Investigators ..... 21

### Supplemental Figures

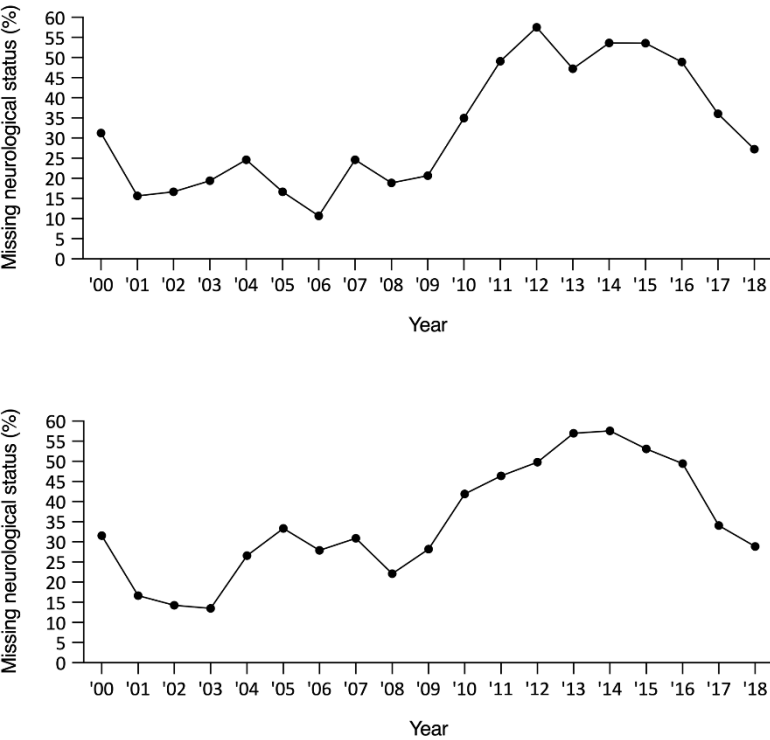

**Figure S1. Missing data for neurological status in survivors to hospital discharge**  
The figure illustrates the proportion of missing data for neurological status (measured by the Pediatric Cerebral Performance Category score) per year in patients surviving to hospital discharge. The upper figure represents missing data in pediatric patients with a pulseless cardiac arrest. The lower figure represents missing data in pediatric patients with a non-pulseless event. *Non-pulseless events refer to events requiring cardiopulmonary resuscitation for bradycardia and poor perfusion.*

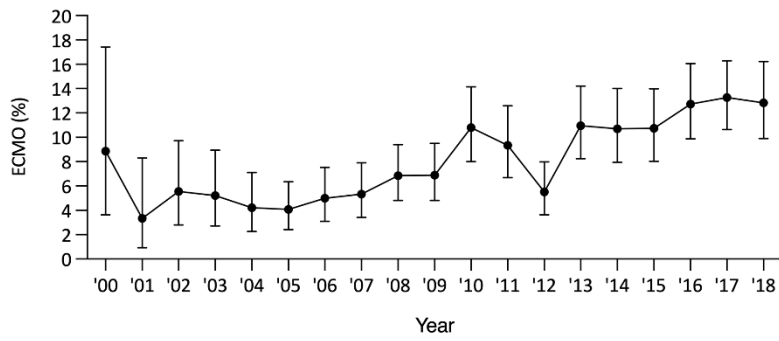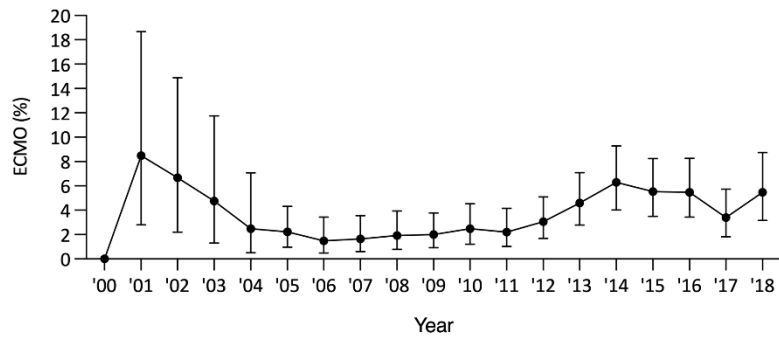

**Figure S2. Trends in extracorporeal membrane oxygenation**

The figure illustrates trends in the use of extracorporeal membrane oxygenation from 2000 to 2018. The upper figure reflects trends in pediatric patients with a pulseless cardiac arrest. The lower figure reflects trends in pediatric patients with a non-pulseless event. *Non-pulseless events refer to events requiring cardiopulmonary resuscitation for bradycardia and poor perfusion.*

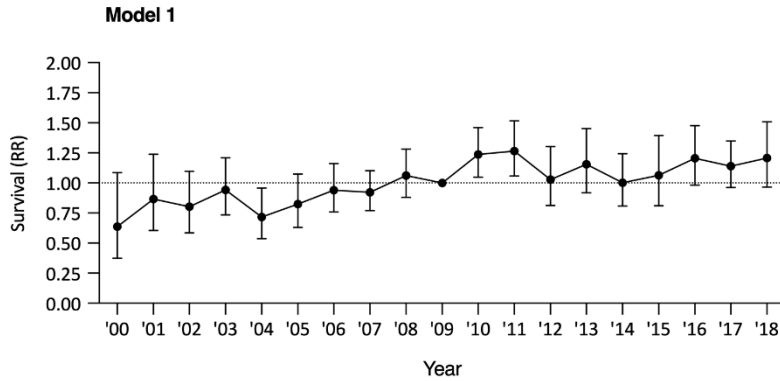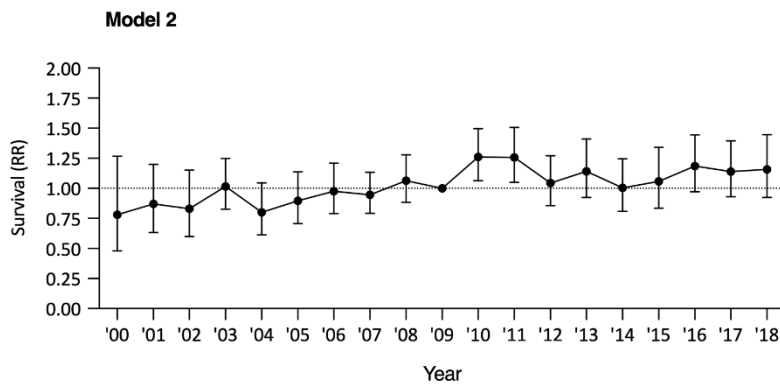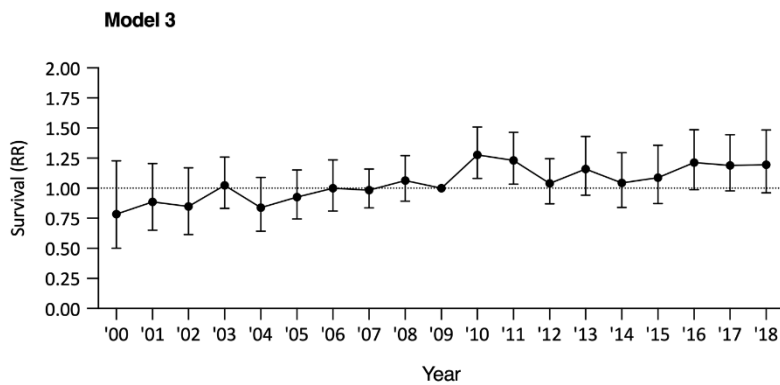

**Figure S3. Relative trends in survival for pulseless cardiac arrests**

The figures illustrate trends in survival to hospital discharge from 2000 to 2018. Results are reported as relative risk ratios with 95% confidence intervals. Year 2009 was used as the reference category and the dashed line represents a relative risk ratio of one. Model 1:

Unadjusted results. Model 2: Adjusted for patient demographics and hospital characteristics.

Model 3: Adjusted for patient, hospital, and event characteristics. The relative change in survival to hospital discharge per unit increase in year was 1.02 (95% CI, 1.01–1.03;  $p < 0.001$ ; Table S5)

for the first model, 1.02 (95% CI, 1.00–1.03;  $p = 0.02$ ; Table S5) for the second model, and 1.02 (95% CI, 1.00–1.03;  $p = 0.01$ ; Table S5) for third model. *RR* denotes *relative risk ratio*.

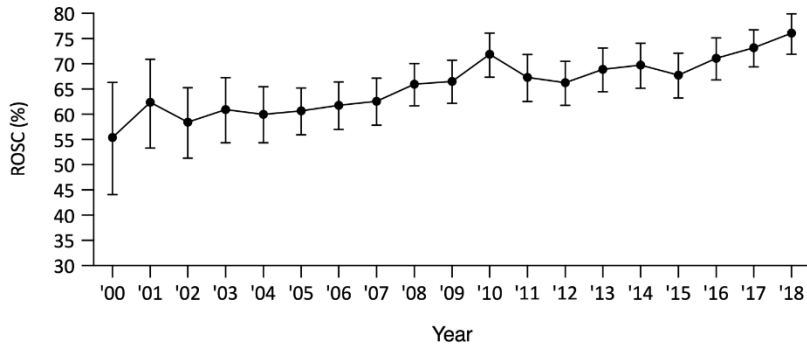

**Figure S4. Absolute trends in ROSC for pulseless cardiac arrests**

The figure illustrates unadjusted trends in ROSC from 2000 to 2018. Results are reported as absolute risks with 95% confidence intervals. The absolute change in ROSC was 0.83% (95% CI, 0.53%–1.14%;  $p < 0.001$ ; Table S4) per unit increase in year. *ROSC denotes return of spontaneous circulation.*

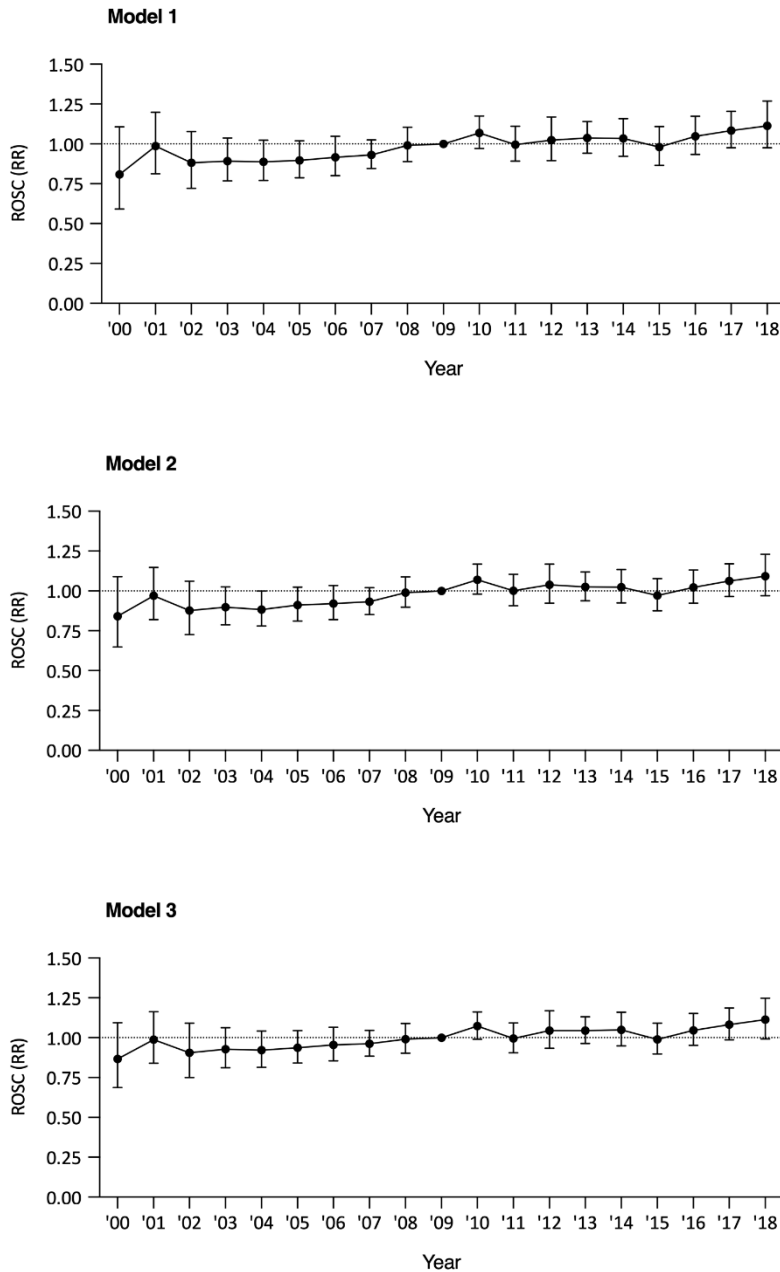

**Figure S5. Relative trends in ROSC for pulseless cardiac arrests**

The figures illustrate trends in ROSC from 2000 to 2018. Results are reported as relative risk ratios with 95% confidence intervals. Year 2009 was used as the reference category and the dashed line represents a relative risk ratio of one. Model 1: Unadjusted results. Model 2: Adjusted for patient demographics and hospital characteristics. Model 3: Adjusted for patient, hospital, and event characteristics. The relative change in ROSC per unit increase in year was 1.01 (95% CI, 1.01–1.02;  $p < 0.001$ ; Table S6) for the first model, 1.01 (95% CI, 1.01–1.02;  $p$



<0.001; Table S6) for the second model and 1.01 (95% CI, 1.01–1.02; p <0.001; Table S6) for third model. *ROSC denotes return of spontaneous circulation; RR denotes relative risk ratio.*

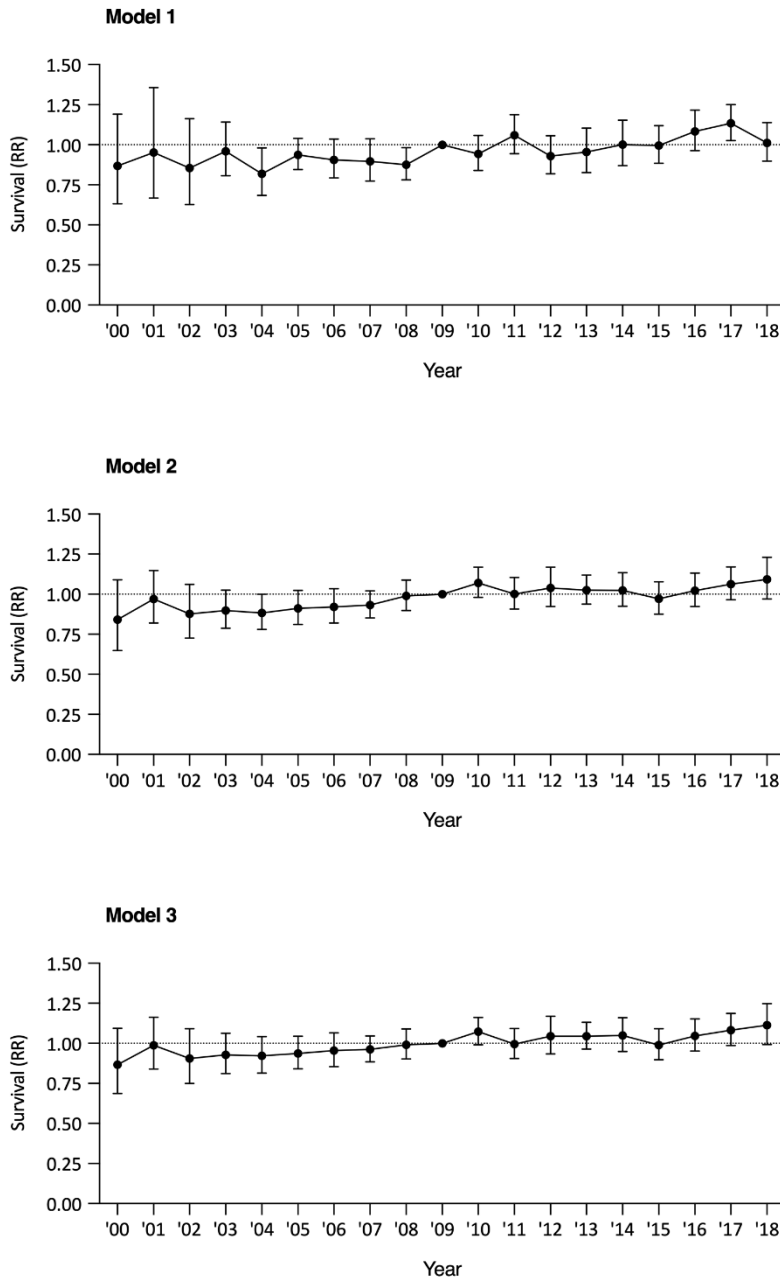

**Figure S6. Relative trends in survival for non-pulseless events**

The figures illustrate trends in survival to hospital discharge from 2000 to 2018. Results are reported as relative risk ratios with 95% confidence intervals. Year 2009 was used as the reference category and the dashed line represents a relative risk ratio of one. Model 1:

Unadjusted results. Model 2: Adjusted for patient demographics and hospital characteristics.

Model 3: Adjusted for patient, hospital, and event characteristics. The relative change in survival to hospital discharge per unit increase in year was 1.01 (95% CI, 1.01–1.02; p = 0.001; Table S8) for the first model, 1.01 (95% CI, 0.99–1.02; p = 0.32; Table S8) for the second model, and 1.01

(95% CI, 1.00–1.02;  $p = 0.26$ ; Table S8) for third model. *Non-pulseless events refer to events requiring cardiopulmonary resuscitation for bradycardia and poor perfusion, RR denotes relative risk ratio.*

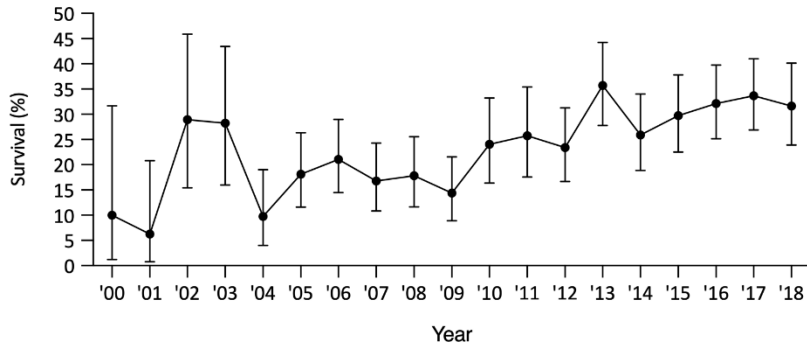

**Figure S7. Absolute trends in survival for events progressing into cardiac arrest**

The figure illustrates unadjusted trends in survival to hospital discharge from 2000 to 2018. Results are reported as absolute risks with 95% confidence intervals. The absolute change in survival to hospital discharge was 0.88% (95% CI, 0.42%–1.35%;  $p < 0.001$ ) per unit increase in year.

## Supplemental Tables

| <b>Table S1. Missing data for pediatric patients meeting all inclusion criteria</b> |                                  |                             |
|-------------------------------------------------------------------------------------|----------------------------------|-----------------------------|
|                                                                                     | <b>Pulseless cardiac arrests</b> | <b>Non-pulseless events</b> |
| <b>Demographics</b>                                                                 |                                  |                             |
| Sex                                                                                 | 3 (>1)                           | 1 (<1)                      |
| Age group                                                                           | 6 (<1)                           | 0 (0)                       |
| Illness category                                                                    | 18 (<1)                          | 1 (<1)                      |
| Pre-existing conditions                                                             | 939 (9)                          | 23 (<1)                     |
| <b>Location and Time of Event</b>                                                   |                                  |                             |
| Location of event                                                                   | 12 (<1)                          | 5 (<1)                      |
| Time of week                                                                        | 0 (0)                            | 0 (0)                       |
| Time of day                                                                         | 262 (2)                          | 142 (2)                     |
| <b>Event Characteristics</b>                                                        |                                  |                             |
| Witnessed                                                                           | 8 (<1)                           | 1 (<1)                      |
| Monitored                                                                           | 7 (<1)                           | 2 (<1)                      |
| Pulseless rhythm                                                                    | 924 (9)                          | NA                          |
| Initial pulseless rhythm                                                            | 2753 (25)                        | NA                          |
| <b>Hospital Characteristics</b>                                                     |                                  |                             |
| Years of GWTG participation                                                         | 0 (0)                            | 0 (0)                       |
| Geographic region                                                                   | 518 (5)                          | 270 (4)                     |
| Geographical area                                                                   | 540 (5)                          | 299 (5)                     |
| Ownership                                                                           | 518 (5)                          | 270 (4)                     |
| Teaching status                                                                     | 540 (5)                          | 299 (5)                     |

NA denotes not applicable.

| <b>Table S2. Additional characteristics of pulseless cardiac arrests</b> |                         |                         |                         |                         |
|--------------------------------------------------------------------------|-------------------------|-------------------------|-------------------------|-------------------------|
|                                                                          | 2000–2005<br>(n = 1403) | 2006–2010<br>(n = 2288) | 2011–2015<br>(n = 2212) | 2016–2018<br>(n = 1530) |
| <b>Event Characteristics</b>                                             |                         |                         |                         |                         |
| Length of resuscitation (min)                                            | 22 (11, 41)             | 19 (7, 37)              | 16 (6, 35)              | 16 (6, 36)              |
| Interventions in place at time of event                                  |                         |                         |                         |                         |
| Mechanical ventilation                                                   | 944 (67)                | 1580 (69)               | 1575 (71)               | 1227 (80)               |
| Vasopressors                                                             | 475 (34)                | 831 (36)                | 744 (34)                | 633 (41)                |
| Arterial line                                                            | 360 (26)                | 646 (28)                | 596 (27)                | 498 (33)                |
| Interventions during the event                                           |                         |                         |                         |                         |
| ECMO                                                                     | 65 (5)                  | 159 (7)                 | 208 (9)                 | 198 (13)                |
| Intubation                                                               | 483 (34)                | 743 (32)                | 697 (32)                | 432 (28)                |
| Epinephrine                                                              | 1261 (90)               | 1994 (87)               | 1923 (87)               | 1326 (87)               |
| Antiarrhythmic                                                           | 254 (18)                | 248 (11)                | 188 (9)                 | 127 (8)                 |
| Atropine                                                                 | 574 (41)                | 704 (31)                | 388 (18)                | 190 (12)                |

*ECMO denotes extracorporeal membrane oxygenation.*

| <b>Table S3. Additional characteristics of non-pulseless events</b> |                        |                         |                         |                         |
|---------------------------------------------------------------------|------------------------|-------------------------|-------------------------|-------------------------|
|                                                                     | 2000–2005<br>(n = 736) | 2006–2010<br>(n = 1914) | 2011–2015<br>(n = 2043) | 2016–2018<br>(n = 1058) |
| <b>Event Characteristics</b>                                        |                        |                         |                         |                         |
| Length of resuscitation (min)                                       | 8 (4, 21)              | 7 (3, 19)               | 5 (3, 12)               | 4 (2, 7)                |
| Interventions in place at time of event                             |                        |                         |                         |                         |
| Mechanical ventilation                                              | 509 (69)               | 1282 (67)               | 1451 (71)               | 874 (83)                |
| Vasopressors                                                        | 195 (26)               | 479 (25)                | 444 (22)                | 250 (24)                |
| Arterial line                                                       | 199 (27)               | 369 (19)                | 442 (22)                | 219 (21)                |
| Interventions during the event                                      |                        |                         |                         |                         |
| ECMO                                                                | 25 (3)                 | 37 (2)                  | 87 (4)                  | 50 (5)                  |
| Intubation                                                          | 275 (37)               | 749 (39)                | 729 (36)                | 280 (26)                |
| Epinephrine                                                         | 443 (60)               | 1098 (57)               | 1163 (57)               | 533 (50)                |
| Atropine                                                            | 194 (26)               | 280 (15)                | 247 (12)                | 88 (8)                  |

*ECMO denotes extracorporeal membrane oxygenation.*

| <b>Table S4. Outcomes for pulseless cardiac arrests (absolute risk)</b> |                                       |                                                    |                                          |                                                    |
|-------------------------------------------------------------------------|---------------------------------------|----------------------------------------------------|------------------------------------------|----------------------------------------------------|
| <b>Year</b>                                                             | <b>Survival to hospital discharge</b> |                                                    | <b>Return of spontaneous circulation</b> |                                                    |
|                                                                         | <b>Events/<br/>Total</b>              | <b>Absolute risk<br/>(95% confidence interval)</b> | <b>Events/<br/>Total</b>                 | <b>Absolute risk<br/>(95% confidence interval)</b> |
| 2000                                                                    | 16/83                                 | 19 (11–29)                                         | 46/83                                    | 55 (44–66)                                         |
| 2001                                                                    | 32/125                                | 26 (18–34)                                         | 78/125                                   | 62 (53–71)                                         |
| 2002                                                                    | 48/202                                | 24 (18–30)                                         | 118/202                                  | 58 (51–65)                                         |
| 2003                                                                    | 67/233                                | 29 (23–35)                                         | 142/233                                  | 61 (54–67)                                         |
| 2004                                                                    | 69/315                                | 22 (17–27)                                         | 189/315                                  | 60 (54–65)                                         |
| 2005                                                                    | 114/445                               | 26 (22–30)                                         | 270/445                                  | 61 (56–65)                                         |
| 2006                                                                    | 122/424                               | 29 (25–33)                                         | 262/424                                  | 62 (57–66)                                         |
| 2007                                                                    | 122/433                               | 28 (24–33)                                         | 271/433                                  | 63 (58–67)                                         |
| 2008                                                                    | 164/511                               | 32 (28–36)                                         | 337/511                                  | 66 (62–70)                                         |
| 2009                                                                    | 150/493                               | 30 (26–35)                                         | 328/493                                  | 67 (62–71)                                         |
| 2010                                                                    | 163/427                               | 38 (34–43)                                         | 307/427                                  | 72 (67–76)                                         |
| 2011                                                                    | 161/407                               | 40 (35–44)                                         | 274/407                                  | 67 (63–72)                                         |
| 2012                                                                    | 146/471                               | 31 (27–35)                                         | 312/471                                  | 66 (62–71)                                         |
| 2013                                                                    | 163/457                               | 36 (31–40)                                         | 315/457                                  | 69 (64–73)                                         |
| 2014                                                                    | 138/430                               | 32 (28–37)                                         | 300/430                                  | 70 (65–74)                                         |
| 2015                                                                    | 153/447                               | 34 (30–39)                                         | 303/447                                  | 68 (63–72)                                         |
| 2016                                                                    | 182/481                               | 38 (33–42)                                         | 342/481                                  | 71 (67–75)                                         |
| 2017                                                                    | 208/589                               | 35 (31–39)                                         | 431/589                                  | 73 (69–77)                                         |
| 2018                                                                    | 176/460                               | 38 (34–43)                                         | 350/460                                  | 76 (72–80)                                         |



**Table S5. Survival for pulseless cardiac arrests (relative risk)**

| Year | Model 1          |           |         | Model 2          |           |         | Model 3          |           |         |
|------|------------------|-----------|---------|------------------|-----------|---------|------------------|-----------|---------|
|      | RR               | 95% CI    | p-value | RR               | 95% CI    | P-value | RR               | 95% CI    | P-value |
| 2000 | 0.64             | 0.37–1.09 | 0.10    | 0.78             | 0.48–1.27 | 0.32    | 0.79             | 0.50–1.23 | 0.29    |
| 2001 | 0.87             | 0.61–1.24 | 0.43    | 0.87             | 0.63–1.20 | 0.40    | 0.89             | 0.65–1.21 | 0.44    |
| 2002 | 0.80             | 0.59–1.10 | 0.17    | 0.83             | 0.60–1.15 | 0.27    | 0.85             | 0.61–1.17 | 0.31    |
| 2003 | 0.94             | 0.73–1.21 | 0.64    | 1.02             | 0.83–1.25 | 0.88    | 1.02             | 0.83–1.26 | 0.82    |
| 2004 | 0.72             | 0.54–0.96 | 0.03    | 0.80             | 0.61–1.05 | 0.10    | 0.84             | 0.64–1.09 | 0.19    |
| 2005 | 0.82             | 0.63–1.07 | 0.15    | 0.90             | 0.71–1.14 | 0.37    | 0.93             | 0.75–1.15 | 0.49    |
| 2006 | 0.94             | 0.76–1.16 | 0.56    | 0.98             | 0.79–1.21 | 0.83    | 1.00             | 0.81–1.24 | 1.00    |
| 2007 | 0.92             | 0.77–1.10 | 0.37    | 0.95             | 0.79–1.13 | 0.55    | 0.98             | 0.84–1.16 | 0.85    |
| 2008 | 1.06             | 0.88–1.28 | 0.53    | 1.06             | 0.89–1.28 | 0.51    | 1.06             | 0.89–1.27 | 0.49    |
| 2009 | 1.00 (Reference) |           |         | 1.00 (Reference) |           |         | 1.00 (Reference) |           |         |
| 2010 | 1.24             | 1.05–1.46 | 0.01    | 1.26             | 1.06–1.50 | 0.01    | 1.28             | 1.08–1.51 | 0.004   |
| 2011 | 1.27             | 1.06–1.52 | 0.01    | 1.26             | 1.05–1.51 | 0.01    | 1.23             | 1.03–1.46 | 0.02    |
| 2012 | 1.03             | 0.81–1.30 | 0.82    | 1.04             | 0.86–1.27 | 0.67    | 1.04             | 0.87–1.24 | 0.67    |
| 2013 | 1.16             | 0.92–1.45 | 0.22    | 1.14             | 0.92–1.41 | 0.22    | 1.16             | 0.94–1.43 | 0.16    |
| 2014 | 1.00             | 0.81–1.24 | 0.98    | 1.00             | 0.81–1.25 | 0.98    | 1.04             | 0.84–1.30 | 0.70    |
| 2015 | 1.06             | 0.81–1.40 | 0.65    | 1.06             | 0.84–1.34 | 0.64    | 1.09             | 0.87–1.36 | 0.46    |
| 2016 | 1.20             | 0.98–1.48 | 0.07    | 1.19             | 0.97–1.45 | 0.09    | 1.21             | 0.99–1.49 | 0.06    |
| 2017 | 1.14             | 0.96–1.35 | 0.13    | 1.14             | 0.93–1.39 | 0.21    | 1.19             | 0.98–1.45 | 0.08    |
| 2018 | 1.21             | 0.97–1.51 | 0.10    | 1.16             | 0.93–1.45 | 0.20    | 1.20             | 0.96–1.48 | 0.11    |

RR denotes relative risk ratio; 95% CI denotes 95% confidence intervals.

**Table S6. ROSC for pulseless cardiac arrests (relative risk)**

| Year | Model 1          |           |         | Model 2          |           |         | Model 3          |           |         |
|------|------------------|-----------|---------|------------------|-----------|---------|------------------|-----------|---------|
|      | RR               | 95% CI    | p-value | RR               | 95% CI    | P-value | RR               | 95% CI    | P-value |
| 2000 | 0.81             | 0.59–1.11 | 0.19    | 0.84             | 0.65–1.09 | 0.19    | 0.87             | 0.69–1.09 | 0.23    |
| 2001 | 0.99             | 0.81–1.20 | 0.89    | 0.97             | 0.82–1.15 | 0.72    | 0.99             | 0.84–1.16 | 0.89    |
| 2002 | 0.88             | 0.72–1.08 | 0.22    | 0.88             | 0.73–1.06 | 0.18    | 0.91             | 0.75–1.09 | 0.30    |
| 2003 | 0.89             | 0.77–1.04 | 0.14    | 0.90             | 0.79–1.02 | 0.11    | 0.93             | 0.81–1.06 | 0.28    |
| 2004 | 0.89             | 0.77–1.02 | 0.10    | 0.88             | 0.78–1.00 | 0.05    | 0.92             | 0.82–1.04 | 0.19    |
| 2005 | 0.90             | 0.79–1.02 | 0.10    | 0.91             | 0.81–1.02 | 0.12    | 0.94             | 0.84–1.04 | 0.24    |
| 2006 | 0.92             | 0.80–1.05 | 0.20    | 0.92             | 0.82–1.03 | 0.16    | 0.95             | 0.85–1.07 | 0.41    |
| 2007 | 0.93             | 0.85–1.02 | 0.14    | 0.93             | 0.85–1.02 | 0.13    | 0.96             | 0.89–1.05 | 0.37    |
| 2008 | 0.99             | 0.89–1.10 | 0.86    | 0.99             | 0.90–1.09 | 0.82    | 0.99             | 0.90–1.09 | 0.85    |
| 2009 | 1.00 (Reference) |           |         | 1.00 (Reference) |           |         | 1.00 (Reference) |           |         |
| 2010 | 1.07             | 0.97–1.17 | 0.18    | 1.07             | 0.98–1.17 | 0.13    | 1.07             | 0.99–1.16 | 0.08    |
| 2011 | 1.00             | 0.89–1.11 | 0.93    | 1.00             | 0.91–1.10 | 0.99    | 0.99             | 0.91–1.09 | 0.91    |
| 2012 | 1.02             | 0.90–1.17 | 0.74    | 1.04             | 0.92–1.17 | 0.53    | 1.04             | 0.93–1.17 | 0.44    |
| 2013 | 1.04             | 0.94–1.14 | 0.46    | 1.03             | 0.94–1.12 | 0.58    | 1.04             | 0.96–1.13 | 0.29    |
| 2014 | 1.03             | 0.92–1.16 | 0.57    | 1.02             | 0.92–1.13 | 0.65    | 1.05             | 0.95–1.16 | 0.35    |
| 2015 | 0.98             | 0.87–1.11 | 0.75    | 0.97             | 0.88–1.08 | 0.58    | 0.99             | 0.90–1.09 | 0.84    |
| 2016 | 1.05             | 0.93–1.17 | 0.43    | 1.02             | 0.92–1.13 | 0.68    | 1.05             | 0.95–1.15 | 0.35    |
| 2017 | 1.08             | 0.98–1.20 | 0.13    | 1.06             | 0.97–1.17 | 0.22    | 1.08             | 0.99–1.19 | 0.10    |
| 2018 | 1.11             | 0.98–1.27 | 0.11    | 1.09             | 0.97–1.23 | 0.15    | 1.11             | 0.99–1.25 | 0.07    |

ROSC denotes return of spontaneous circulation; RR denotes relative risk ratio; 95% CI denotes 95% confidence intervals

| <b>Table S7. Survival for non-pulseless events (absolute risk)</b> |                          |                                                    |
|--------------------------------------------------------------------|--------------------------|----------------------------------------------------|
| <b>Survival to hospital discharge</b>                              |                          |                                                    |
| <b>Year</b>                                                        | <b>Events/<br/>Total</b> | <b>Absolute risk<br/>(95% confidence interval)</b> |
| 2000                                                               | 19/33                    | 58 (39–75)                                         |
| 2001                                                               | 36/59                    | 61 (47–73)                                         |
| 2002                                                               | 42/76                    | 55 (43–67)                                         |
| 2003                                                               | 52/84                    | 62 (51–72)                                         |
| 2004                                                               | 64/121                   | 53 (44–62)                                         |
| 2005                                                               | 222/363                  | 61 (56–66)                                         |
| 2006                                                               | 197/337                  | 58 (53–64)                                         |
| 2007                                                               | 207/365                  | 57 (51–62)                                         |
| 2008                                                               | 199/362                  | 55 (50–60)                                         |
| 2009                                                               | 287/448                  | 64 (59–69)                                         |
| 2010                                                               | 241/402                  | 60 (55–65)                                         |
| 2011                                                               | 276/408                  | 68 (63–72)                                         |
| 2012                                                               | 271/457                  | 59 (55–64)                                         |
| 2013                                                               | 251/413                  | 61 (56–66)                                         |
| 2014                                                               | 238/366                  | 65 (60–70)                                         |
| 2015                                                               | 258/399                  | 65 (60–69)                                         |
| 2016                                                               | 269/383                  | 70 (65–75)                                         |
| 2017                                                               | 282/383                  | 74 (69–78)                                         |
| 2018                                                               | 194/292                  | 66 (61–72)                                         |

**Table S8. Survival for non-pulseless events (relative risk)**

| Year | Model 1          |           |         | Model 2          |           |         | Model 3          |           |         |
|------|------------------|-----------|---------|------------------|-----------|---------|------------------|-----------|---------|
|      | RR               | 95% CI    | p-value | RR               | 95% CI    | P-value | RR               | 95% CI    | P-value |
| 2000 | 0.87             | 0.63–1.19 | 0.38    | 0.92             | 0.75–1.14 | 0.44    | 0.90             | 0.74–1.11 | 0.33    |
| 2001 | 0.95             | 0.67–1.36 | 0.78    | 0.88             | 0.65–1.20 | 0.43    | 0.89             | 0.67–1.20 | 0.45    |
| 2002 | 0.85             | 0.63–1.16 | 0.32    | 0.87             | 0.61–1.25 | 0.45    | 0.89             | 0.62–1.27 | 0.51    |
| 2003 | 0.96             | 0.81–1.14 | 0.64    | 0.91             | 0.78–1.05 | 0.19    | 0.90             | 0.77–1.05 | 0.17    |
| 2004 | 0.82             | 0.68–0.98 | 0.03    | 0.87             | 0.72–1.05 | 0.15    | 0.86             | 0.71–1.03 | 0.11    |
| 2005 | 0.94             | 0.85–1.04 | 0.22    | 1.00             | 0.90–1.12 | 0.96    | 1.00             | 0.89–1.11 | 0.94    |
| 2006 | 0.91             | 0.79–1.04 | 0.15    | 0.95             | 0.82–1.09 | 0.46    | 0.95             | 0.83–1.09 | 0.50    |
| 2007 | 0.90             | 0.77–1.04 | 0.14    | 0.91             | 0.79–1.05 | 0.18    | 0.91             | 0.80–1.04 | 0.16    |
| 2008 | 0.88             | 0.78–0.98 | 0.02    | 0.89             | 0.80–1.00 | 0.05    | 0.89             | 0.80–0.99 | 0.03    |
| 2009 | 1.00 (Reference) |           |         | 1.00 (Reference) |           |         | 1.00 (Reference) |           |         |
| 2010 | 0.94             | 0.84–1.06 | 0.32    | 0.95             | 0.86–1.06 | 0.39    | 0.95             | 0.86–1.05 | 0.32    |
| 2011 | 1.06             | 0.94–1.19 | 0.32    | 1.05             | 0.93–1.18 | 0.45    | 1.04             | 0.92–1.17 | 0.56    |
| 2012 | 0.93             | 0.82–1.06 | 0.27    | 0.93             | 0.82–1.07 | 0.32    | 0.93             | 0.81–1.07 | 0.30    |
| 2013 | 0.96             | 0.83–1.10 | 0.54    | 0.96             | 0.83–1.10 | 0.53    | 0.95             | 0.83–1.09 | 0.49    |
| 2014 | 1.00             | 0.87–1.15 | 0.98    | 0.98             | 0.83–1.14 | 0.76    | 0.99             | 0.84–1.16 | 0.89    |
| 2015 | 0.99             | 0.88–1.12 | 0.93    | 0.96             | 0.84–1.10 | 0.55    | 0.97             | 0.84–1.11 | 0.63    |
| 2016 | 1.08             | 0.96–1.22 | 0.18    | 1.01             | 0.88–1.16 | 0.93    | 1.00             | 0.87–1.15 | 0.98    |
| 2017 | 1.13             | 1.03–1.25 | 0.01    | 1.09             | 0.96–1.23 | 0.19    | 1.09             | 0.96–1.23 | 0.17    |
| 2018 | 1.01             | 0.90–1.14 | 0.86    | 0.95             | 0.84–1.07 | 0.40    | 0.95             | 0.85–1.07 | 0.43    |

RR denotes relative risk ratio; 95% CI denotes 95% confidence intervals.

## **Get With The Guidelines® – Resuscitation Investigators**

Besides the author Monica Kleinman, M.D., members of the Get With The Guidelines®-Resuscitation Pediatric Research Task Force include: Anne-Marie Guerguerian, M.D., Ph.D., F.R.C.P.C., Dianne Atkins, M.D., Elizabeth Foglia, M.D., M.S.C.E., Jordan Duval-Arnould, M.P.H., Dr.P.H. Ericka Fink, M.D., Javier J. Lasa, M.D., F.A.A.P., Joan Roberts, M.D., Melanie Bembea, M.D., M.P.H., Michael Gaies, M.D., M.P.H., M.Sc., Punkaj Gupta, M.B.B.S., Robert Sutton, M.D., M.S.C.E., Taylor Sawyer, D.O.Med.
